# Supplementary figures and images for: Recovery of Au(III) from electronic waste using solid phase extraction based on a magetic nanobiocomposite, OCBS@Fe3O4 @UiO-66-SH
Source: Research Square preprint supplement (doi:10.21203/rs.3.rs-6054990/v1), 2025-02-21

GA


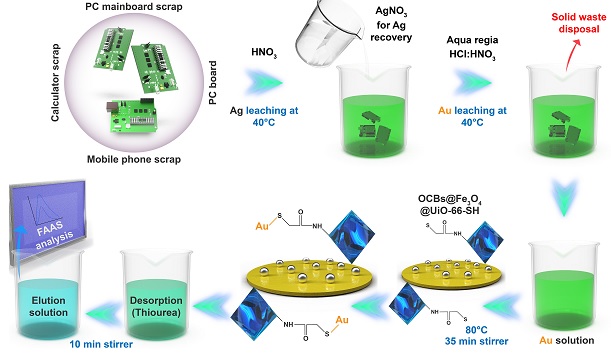

Supplement: Supplementary file 2 [file 84176d3d5423d20cd05c3f5d.docx]
